# Supplementary material
Source: Springer Nature journal article supplement (https://www.springerprofessional.de/resource/supplementary/13638_2013_1054_MOESM4_ESM.pdf/11898864)
Supplement: MOESM4 [file 11898864]

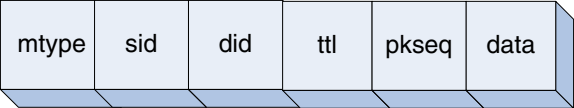

mtype: message type (DATA)

sid: identifier of the node sending the message

did: identifier of the node receiving the message

ttl: Time to Live

pkseq: sequence of data message

data: data payload
